# Supplementary material
Source: Springer Nature journal article supplement (https://www.springermedizin.de/resource/supplementary/13014_2011_408_MOESM2_ESM.pdf/9633728)

### xomat films

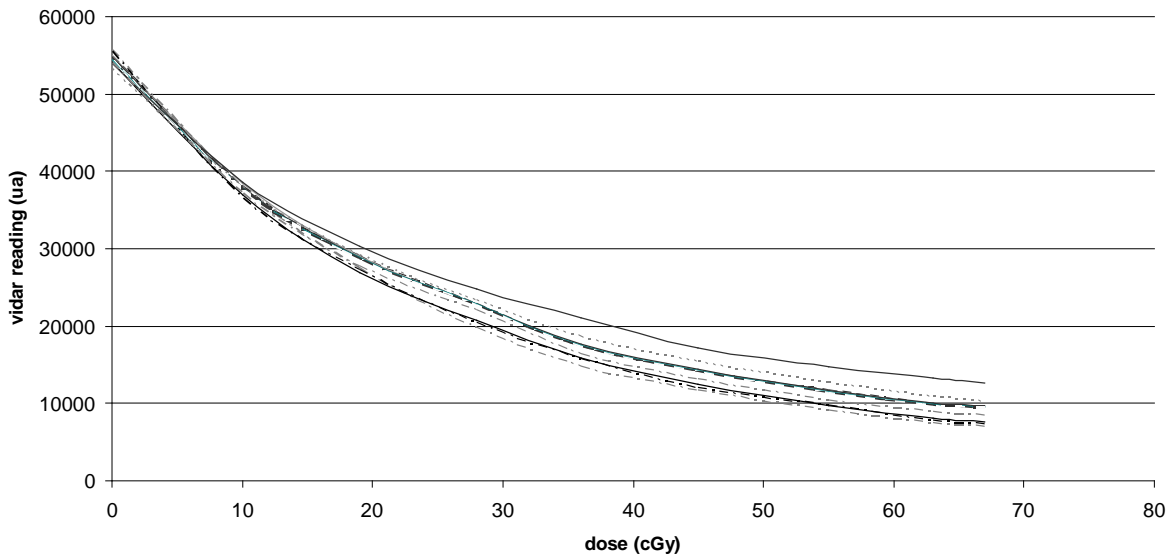

( a )

### EDR2 films

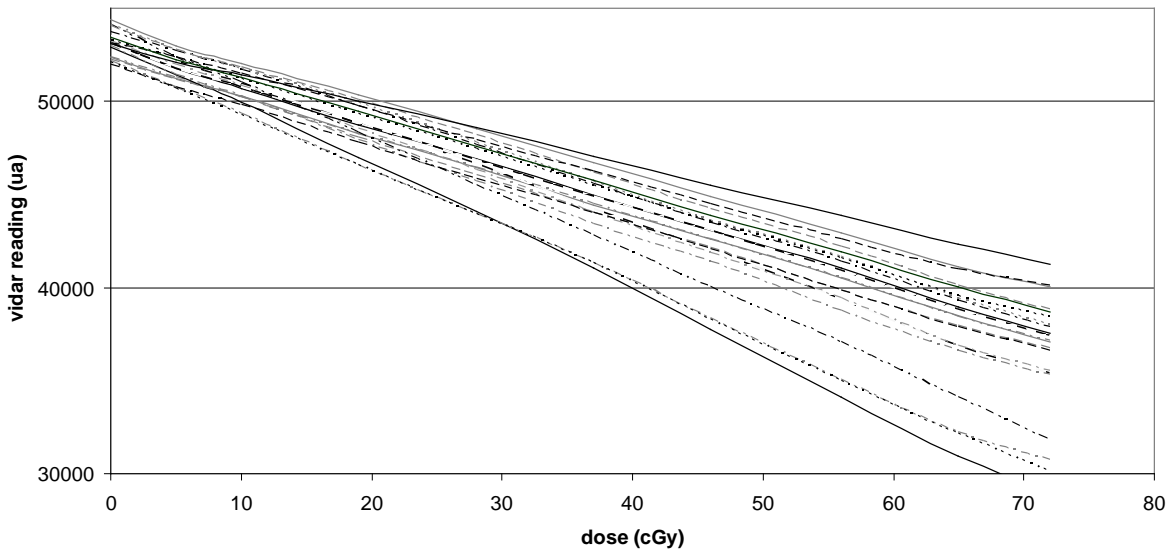

( b )

Supplement: MOESM2 [file 9633728]
